# Supplementary material
Source: PubMed Central journal article supplement (PMC2238218)

**Supplemental Figure 1: Production of recombinant forms of PhoP-Rv and PhoP-Ra in 1237 $\Delta$ phoPR::hyg.**

The production of PhoP-Rv and PhoP-Ra from pVVphoP-Rv and pVVphoP-Ra in 1237 $\Delta$ phoPR::hyg was analyzed by immunoblotting with the monoclonal Penta-His antibody from Qiagen. 30  $\mu$ g of protein were loaded per lane. 1, 1237 $\Delta$ phoPR::hyg/pVVphoP-Rv; 2, 1237 $\Delta$ phoPR::hyg/pVVphoP-Ra.

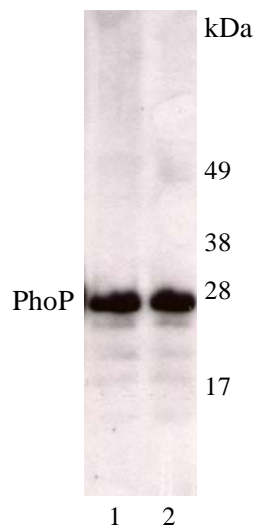

## **Supplemental Figure 2: Generation of a *pks2-pk3/4* mutant of *M. tb* H37Rv.**

The *ts-sacB* method (30) was used to achieve allelic replacement at the *pks2* locus of the *pks3/4* *M. tb* mutant, *msl3* (12). The *M. tb* H37Rv *pks2* gene and flanking regions was extracted from cosmid MTCY409 on a 6576-bp *EcoRI* restriction fragment and a disrupted allele, *pks2::kan*, was obtained by replacing 3049-bp of the coding sequence of this gene bracketed between two *NruI* sites with the kanamycin resistance cassette from pUC4K (Amersham Pharmacia Biotech). Allelic replacement at the *pks2* locus of the *msl3* strain was confirmed by PCR using primers *pks2.1* and *pks2.2* (see Materials and Methods). In the mutants ( $\Delta$ ), the wild-type 3162-bp *pks2.1/pks2.2* PCR fragment (WT) is replaced by a 1313-bp PCR fragment due to the 3049-bp *NruI* deletion in their *pks2* gene and insertion of a 1.2 kb-kanamycin resistance cassette. MWM, molecular weight marker (Invitrogen). N, *NruI* restriction site.

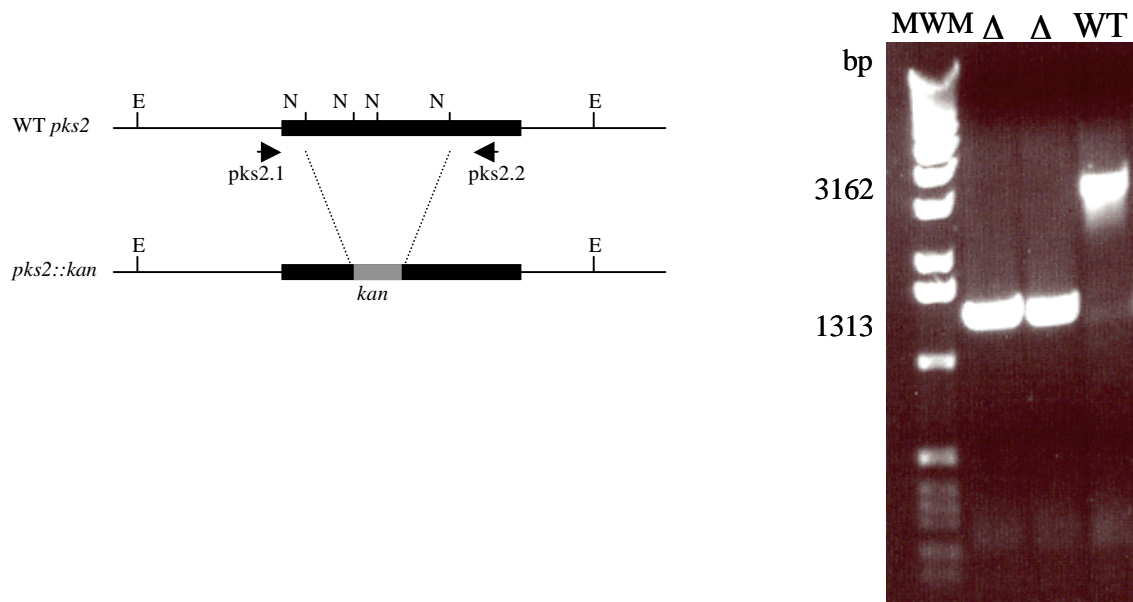

**Supplemental Figure 3: Acyltrehalose composition of the *msl3Δpks2* mutant.**

Autoradiograms of thin-layer chromatograms of lipids derived from [1-<sup>14</sup>C]propionate (30,000 cpm per lane) are shown. The TLC was developed in chloroform: methanol: water (90:10:1, vol.:vol.:vol.). *msl3* was reported to be deficient in DAT and PAT synthesis (12,33). The disruption of *pks2* in this mutant further leads to the abolition of SL synthesis in this strain. Lane 1, *M. tb* H37Rv; lane 2, *msl3Δpks2*.

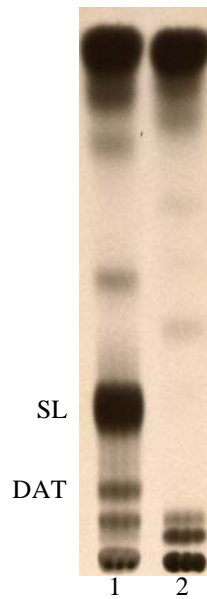

Supplement: jbacter_190_4_1329__1.pdf [file jbacter_190_4_1329__1.pdf]
